# Supplementary material
Source: publisher site journal article supplement (https://www.dovepress.com/article/568337)
Supplement: Supplementary file 1 [file 568337%20Revised%20%20Supplementary%20Materials.docx]

**Supplementary Material**

S1: Histopathological examination

S2: MRI Examination

S3. Inter-observer reproducibility analysis

S4: Multi-slice sensitivity analysis for Deep Learning features

S5: Number of features retained after each selection step

S6. Final Features Included in the DLR Model

S7. Final Logistic Regression Formula of the DLR Model

S8. Classifier Comparison Across Models

S9. Threshold Selection and Clinical Trade-offs

S10. Bootstrap Validation and Calibration

**S1.** Histopathological examination

Baseline clinical data, including age, menstrual status, and other relevant characteristics, was obtained from the hospital’s electronic medical records. The expression status of estrogen receptor (ER), progesterone receptor (PR), human epidermal growth factor receptor 2 (HER2), and the Ki-67 index were determined via immunohistochemistry (IHC). Hormone receptor (HR) positivity was defined as ≥1% nuclear staining of either ER or PR; and tumors were classified as HER2-negative if IHC staining was 0 or 1+, and as HER2-positive if the IHC score was 3+[20]. In cases with an IHC score of 2+, HER2 status was determined by fluorescence in situ hybridization to assess gene amplification[20]. Based on receptor status, tumors were classified into three molecular subtypes: (i) HR+/HER2-, (ii) HER2+, and (iii) triple negative breast cancer (TNBC). Ki-67 expression was evaluated using a cutoff value of 20%; tumors with <20% staining were considered to have low proliferation, while those with ≥20% were considered highly proliferative[21]. Clinical tumor stage was assessed according to the American Joint Committee on Cancer TNM staging system manual, 8th edition[22].

**S2.** MRI Examination

MRI examinations were conducted using a 3.0 T GE Discovery 750 scanner (GE Healthcare) within 2 weeks before and after NAT. The imaging protocol included axial T2-weighted imaging (T2WI) with fat suppression, diffusion-weighted imaging (DWI), and dynamic contrast-enhanced magnetic resonance imaging (DCE-MRI). Patients were scanned in the prone position with both breasts suspended in a dedicated bilateral breast phased-array surface coil. For DCE-MRI, pre-contrast T1-weighted images were first acquired, followed by a dynamic series using the Vibrant 3D sequence. A gadolinium-based contrast agent (Gd-DTPA, Magnevist; Bayer Healthcare) was administered intravenously at a dose of 0.2 mmol/kg body weight and an injection rate of 2.0 mL/s using a power injector. Subsequently, seven consecutive post-contrast phases were acquired at approximately 60-second intervals. A 10 mL saline flush was injected at the same rate to ensure complete contrast delivery. DWI was performed with b-values of 0 and 800 s/mm², and apparent diffusion coefficient (ADC) maps were automatically generated. To standardize image acquisition and minimize inter-protocol variability, axial T2WI with fat suppression and DCE-MRI sequences were performed with consistent parameters across all patients. For tumor localization and segmentation, early post-contrast images (90–120 seconds after injection) were used, as they provide optimal tumor-to-normal tissue contrast. All raw imaging data were transferred to an Advantage Workstation (ADW 4.4, GE Healthcare) for post-processing, including multiplanar reconstruction, region of interest (ROI) segmentation, and signal intensity analysis.

**S3**. Inter-observer reproducibility analysis

To assess the reproducibility of manual tumor segmentation, a subset of breast MRI scans (n = 33; randomly selected from the full cohort) was independently segmented by two radiologists with 8 and 12 years of experience in breast imaging. Radiomic features were extracted from each segmentation using the same feature extraction pipeline described in the main Methods section.

Inter-observer agreement for radiomic features was quantified using the two-way random-effects intraclass correlation coefficient (ICC) which reflects both the absolute agreement and the reliability between observers. ICC values were calculated for all radiomic features using the pingouin statistical package (Python version 3.11.7).

Radiomic features demonstrating ICC ≥ 0.80 were considered sufficiently reproducible and were retained for subsequent modeling.。

**S4**: Multi-slice sensitivity analysis for Deep Learning features

To evaluate whether the use of a single axial slice introduced bias or loss of information, a sensitivity analysis was performed by extracting DL features from three adjacent slices rather than from the single largest tumor-containing slice.

For each patient, the axial slice with the maximal tumor cross-sectional area was identified as the index slice. The immediate superior and inferior slices (index ± 1) were also extracted. DL features were generated from each slice using the same ResNet-50–based pipeline as described in the main Methods. The resulting 2048-dimensional feature vectors from the three slices were averaged to obtain a multi-slice DL representation.

These features were incorporated into the DLR model using the same feature selection and classification procedures applied to the primary single-slice model. Model performance metrics, including AUC, accuracy, sensitivity, and specificity, were compared between the single-slice and multi-slice approaches.

**S4.1** Comparison of model performance between single-slice and multi-slice DL features

| Model version | AUC | 95% CI | Accuracy (%) | Sensitivity (%) | Specificity (%) |
| --- | --- | --- | --- | --- | --- |
| Single-slice DL features | 0.771 | 0.662-0.880 | 76.3 | 68.7 | 76.5 |
| Multi-slice DL features | 0.865 | 0.811-0.919 | 79.7 | 82.3 | 72.2. |

**S5.** Number of features retained after each selection step

| Feature type | Initial count | PCA | After ICC | After Mann–Whitney U test | After Spearman correlation | After LASSO | Final selected |
| --- | --- | --- | --- | --- | --- | --- | --- |
| Radiomics | 10,773 | – | 5282 | 612 | 90 | 9 | 9 |
| DL | 6,144 | 384 | – | 24 | 17 | 10 | 10 |
| Clinical | 8 | – | – | – | – | – | 3 |

**S6. Final Features Included in the DLR Model**

The final DLR model incorporated clinical variables, handcrafted radiomic features, and deep learning–derived features selected through a multi-step pipeline (ICC filtering, Spearman correlation, Mann–Whitney U test, and LASSO with 10-fold cross-validation). All feature selection was performed exclusively within the training cohort to avoid data leakage.

S6.1 Selected Features

| Feature | **Type** | **Timepoint** | Coefficient (β) | Biological/Imaging Rationale |
| --- | --- | --- | --- | --- |
| HER2 | Clinical | - | +0.139688 | HER2-positive tumors respond better to NAT, especially under anti-HER2 targeted therapy. |
| ER | Clinical | - | −0.052730 | ER-positive tumors exhibit lower chemosensitivity and slower regression |
| T_stage | Clinical | - | −0.125439 | Larger tumors exhibit greater heterogeneity and poorer drug penetration |
| wavelet_HHH_firstorder_Skewness_T2WI_pre | Radiomics | Pre-NAT | +0.072020 | Higher skewness reflects heterogeneous water content; responsive tumors often show internal necrosis/mucinous change |
| wavelet_LLL_firstorder_Kurtosis_DCE_post | Radiomics | Post-NAT | +0.065355 | High kurtosis indicates homogeneous post-treatment enhancement, consistent with good response |
| wavelet_LLL_firstorder_TotalEnergy_DWI_delta | Radiomics | Delta | +0.042516 | Delta reduction suggests decreased diffusion restriction (cellularity loss) |
| wavelet_HLL_glcm_ClusterShade_DCE_delta | Radiomics | Delta | +0.025131 | Texture symmetry improvements reflect vascular destruction/response |
| wavelet_HHL_glcm_ClusterShade_DCE_delta | Radiomics | Delta | −0.015350 | Persistent asymmetry indicates residual tumor or fibrosis |
| log_sigma_3_0_mm_3D_gldm_LargeDependenceLowGrayLevelEmphasis_DCE_delta | Radiomics | Delta | −0.022144 | Large low-gray-level clusters suggest persistent dense tissue/residual tumor |
| wavelet_LHH_firstorder_Skewness_DWI_post | Radiomics | Post-NAT | −0.040108 | Residual skewness reflects persistent diffusion restriction (residual cancer) |
| original_shape_Flatness_DCE_post | Radiomics | Post-NAT | −0.042630 | Persistent irregular shape indicates incomplete response |
| wavelet_LHL_firstorder_Median_DWI_delta | Radiomics | Delta | −0.071956 | Limited increase in diffusion signal implies insufficient cellular breakdown |
| DL_2_delta | DL | Delta | +0.078077 | Captures structural changes consistent with strong treatment response |
| DL_69_post | DL | Post-NAT | +0.067212 | Indicates reduced vascularity/heterogeneity post-treatment |
| DL_5_pre | DL | Pre-NAT | +0.062982 | Pre-treatment features associated with highly chemo-sensitive subtypes |
| DL_8_delta | DL | Delta | +0.049462 | Delta features reflecting substantial therapy-induced texture change |
| DL_16_pre | DL | Pre-NAT | +0.022898 | May encode HER2/high-proliferative phenotypes |
| DL_7_delta | DL | Delta | +0.012467 | Associated with pronounced morphological changes post-therapy |
| DL_16_post | DL | Post-NAT | −0.023369 | Persistent post-treatment heterogeneity suggests residual tumor |
| DL_100_post | DL | Post-NAT | −0.051406 | Captures remaining enhancement/density patterns linked to residual disease |
| DL_119_pre | DL | Pre-NAT | −0.059892 | Pre-treatment signatures associated with less chemo-responsive phenotypes |
| DL_5_delta | DL | Delta | −0.118215 | Delta pattern indicates insufficient structural regression |

**S7. Final Logistic Regression Formula of the DLR Model**

The final DLR classifier is a logistic regression model integrating clinical, radiomic, and deep learning–derived features. All continuous predictors were standardized using z-score normalization within the training cohort before model fitting.

The linear predictor (label, i.e., logit of the apCR probability) is given by:

label=

label = 0.5423728813559322 + +0.139688 * HER2 -0.118215 * DL_5_delta -0.125439 * T_stage -0.052730 * ER -0.022144 * log_sigma_3_0_mm_3D_gldm_LargeDependenceLowGrayLevelEmphasis_DCE_delta +0.067212 * DL_69_post -0.015350 * wavelet_HHL_glcm_ClusterShade_DCE_delta +0.072020 * wavelet_HHH_firstorder_Skewness_T2WI_pre +0.065355 * wavelet_LLL_firstorder_Kurtosis_DCE_post +0.022898 * DL_16_pre +0.049462 * DL_8_delta -0.042630 * original_shape_Flatness_DCE_post -0.051406 * DL_100_post -0.040108 * wavelet_LHH_firstorder_Skewness_DWI_post +0.062982 * DL_5_pre -0.023369 * DL_16_post +0.078077 * DL_2_delta +0.025131 * wavelet_HLL_glcm_ClusterShade_DCE_delta +0.042516 * wavelet_LLL_firstorder_TotalEnergy_DWI_delta -0.059892 * DL_119_pre -0.071956 * wavelet_LHL_firstorder_Median_DWI_delta +0.012467 * DL_7_delta

**S8. Classifier Comparison Across Models**

Eight classifiers were evaluated (LR, NB, SVM, KNN, LightGBM, Gradient Boosting, AdaBoost, MLP).

**S8.1** Performances of different machine learning models for predicting apCR to NAT in the training cohort.

| Algorithm | models | AUC  (95%CI) | Accuracy(%) | Sensitivity(%) | Specificity(%) | PPV(%) | NPV(%) | F1 Score |
| --- | --- | --- | --- | --- | --- | --- | --- | --- |
| LR | Clinical | 0.804(0.742-0.867) | 0.74 | 0.854 | 0.605 | 0.719 | 0.778 | 0.781 |
|  | Radiomics | 0.849(0.790-0.908) | 81.9 | 86.5 | 76.5 | 81.4 | 82.7 | 0.838 |
|  | DL | 0.873(0.822-0.923) | 81.4 | 95.8 | 64.2 | 76.0 | 92.9 | 0.848 |
|  | DLR | 0.939(0.905-0.974) | 88.7 | 89.6 | 87.7 | 89.6 | 87.7 | 0.896 |
| Naïve Bayes | Clinical | 0.808(0.746-0.869) | 74.0 | 85.4 | 60.5 | 71.9 | 77.8 | 0.781 |
|  | Radiomics | 0.702(0.626-0.779) | 68.9 | 75.0 | 61.7 | 69.9 | 67.6 | 0.724 |
|  | DL | 0.865(0.811-0.919) | 79.7 | 82.3 | 76.5 | 80.6 | 78.5 | 0.814 |
|  | DLR | 0.869(0.813-0.924) | 82.5 | 80.2 | 85.2 | 86.5 | 78.4 | 0.832 |
| SVM | Clinical | 0.766(0.692-0.840) | 74.6 | 74.0 | 75.3 | 78.0 | 70.9 | 0.759 |
|  | Radiomics | 0.902(0.856-0.948) | 84.2 | 93.7 | 72.8 | 80.4 | 90.8 | 0.865 |
|  | DL | 0.971(0.950-0.992) | 92.1 | 91.7 | 92.6 | 93.6 | 90.4 | 0.926 |
|  | DLR | 0.985(0.972-0.998) | 94.9 | 94.8 | 95.1 | 95.8 | 93.9 | 0.953 |
| KNN | Clinical | 0.792(0.729-0.856) | 74.6 | 85.4 | 61.7 | 72.6 | 78.1 | 0.785 |
|  | Radiomics | 0.863(0.810-0.916) | 83.6 | 88.5 | 77.8 | 82.5 | 85.1 | 0.854 |
|  | DL | 0.850(0.798-0.903) | 75.7 | 75.0 | 76.5 | 79.1 | 72.1 | 0.770 |
|  | DLR | 0.912(0.872-0.952) | 84.7 | 89.6 | 79.0 | 83.5 | 86.5 | 0.864 |
| LightGBM | Clinical | 0.815(0.754-0.877) | 74.0 | 75.0 | 72.8 | 76.6 | 71.1 | 0.758 |
|  | Radiomics | 0.907(0.864-0.951) | 85.9 | 84.4 | 87.7 | 89.0 | 82.6 | 0.866 |
|  | DL | 0.947(0.917-0.978) | 88.1 | 94.8 | 80.2 | 85.0 | 92.9 | 0.897 |
|  | DLR | 0.961(0.934-0.987) | 89.8 | 86.5 | 93.8 | 94.3 | 85.4 | 0.902 |
| GradientBoosting | Clinical | 0.821(0.761-0.881) | 74.0 | 70.8 | 77.8 | 79.1 | 69.2 | 0.747 |
|  | Radiomics | 0.971(0.952-0.990) | 91.0 | 90.6 | 91.4 | 92.6 | 89.2 | 0.916 |
|  | DL | 0.974(0.954-0.994) | 93.8 | 97.9 | 88.9 | 91.3 | 97.3 | 0.945 |
|  | DLR | 0.982(0.968-0.996) | 94.4 | 95.8 | 92.6 | 93.9 | 94.9 | 0.948 |
| AdaBoost | Clinical | 0.816(0.755-0.877) | 74.0 | 70.8 | 77.8 | 79.1 | 69.2 | 0.747 |
|  | Radiomics | 0.876(0.825-0.926) | 80.2 | 68.7 | 93.8 | 93.0 | 71.7 | 0.790 |
|  | DL | 0.921(0.882-0.959) | 84.7 | 83.3 | 86.4 | 87.9 | 81.4 | 0.856 |
|  | DLR | 0.937(0.904-0.969) | 86.4 | 80.2 | 93.8 | 93.9 | 80.0 | 0.865 |
| MLP | Clinical | 0.810(0.749-0.872) | 74.0 | 81.2 | 65.4 | 73.6 | 74.6 | 0.772 |
|  | Radiomics | 0.858(0.804-0.913) | 78.5 | 82.3 | 74.1 | 79.0 | 77.9 | 0.806 |
|  | DL | 0.886(0.835-0.936) | 83.1 | 86.5 | 79.0 | 83.0 | 83.1 | 0.847 |
|  | DLR | 0.929(0.892-0.966) | 86.4 | 87.5 | 85.2 | 87.5 | 85.2 | 0.875 |

Abbrevation: apCR, axillary pathological complete response; AUC, area under the curve; CI, confidence interval; PPV, positive predictive value; NPV, negative predictive value; DL, deep learning; DLR, deep learning radiomics; NAT, neoadjuvant therapy; LR: logistic regression, SVM, support vector machine, KNN, K-nearest neighbors; LightGBM, Light Gradient Boosting Machine; MLP, multilayer perceptron.

**S8.2.** Performances of different machine learning models for predicting apCR to NAT in the validation cohort.

| Algorithm | models | AUC  (95%CI) | Accuracy(%) | Sensitivity(%) | Specificity(%) | PPV(%) | NPV(%) | F1 Score |
| --- | --- | --- | --- | --- | --- | --- | --- | --- |
| LR | Clinical | 0.631(0.508-0.755) | 0.597 | 0.521 | 0.724 | 0.758 | 0.477 | 0.617 |
|  | Radiomics | 0.725(0.611-0.839) | 71.4 | 72.9 | 69.0 | 79.5 | 60.6 | 0.761 |
|  | DL | 0.777(0.668-0.887) | 74.0 | 68.7 | 82.8 | 86.8 | 61.5 | 0.767 |
|  | DLR | 0.856(0.774-0.938) | 77.9 | 77.1 | 79.3 | 86.0 | 67.6 | 0.813 |
| Naïve Bayes | Clinical | 0.638(0.515-0.760) | 62.3 | 60.4 | 65.5 | 74.4 | 50.0 | 0.667 |
|  | Radiomics | 0.589(0.460-0.719) | 66.2 | 72.9 | 55.2 | 72.9 | 55.2 | 0.729 |
|  | DL | 0.771(0.662-0.880) | 75.3 | 68.7 | 86.2 | 89.2 | 62.5 | 0.776 |
|  | DLR | 0.680(0.559-0.800) | 67.5 | 68.7 | 65.5 | 76.7 | 55.9 | 0.725 |
| SVM | Clinical | 0.582(0.448-0.716) | 61.0 | 62.5 | 58.6 | 71.4 | 48.6 | 0.667 |
|  | Radiomics | 0.716(0.598-0.834) | 68.8 | 68.7 | 69.0 | 78.6 | 57.1 | 0.733 |
|  | DL | 0.815(0.715-0.915) | 75.3 | 75.0 | 75.9 | 83.7 | 64.7 | 0.791 |
|  | DLR | 0.812(0.715-0.909) | 77.9 | 79.2 | 75.9 | 84.4 | 68.7 | 0.817 |
| KNN | Clinical | 0.631(0.508-0.755) | 61.0 | 60.4 | 62.1 | 72.5 | 48.6 | 0.659 |
|  | Radiomics | 0.648(0.527-0.769) | 54.5 | 35.4 | 86.2 | 81.0 | 44.6 | 0.493 |
|  | DL | 0.731(0.618-0.845) | 67.5 | 66.7 | 69.0 | 78.0 | 55.6 | 0.719 |
|  | DLR | 0.769(0.663-0.875) | 64.9 | 47.9 | 93.1 | 92.0 | 51.9 | 0.630 |
| LightGBM | Clinical | 0.618(0.493-0.743) | 61.0 | 62.5 | 58.6 | 71.4 | 48.6 | 0.667 |
|  | Radiomics | 0.612(0.484-0.739) | 62.3 | 58.3 | 69.0 | 75.7 | 50.0 | 0.659 |
|  | DL | 0.624(0.484-0.763) | 68.8 | 81.2 | 48.3 | 72.2 | 60.9 | 0.765 |
|  | DLR | 0.700(0.579-0.822) | 67.5 | 68.7 | 65.5 | 76.7 | 55.9 | 0.725 |
| GradientBoosting | Clinical | 0.621(0.496-0.745) | 61.0 | 62.5 | 58.6 | 71.4 | 48.6 | 0.667 |
|  | Radiomics | 0.575(0.438-0.712) | 66.2 | 79.2 | 44.8 | 70.4 | 56.5 | 0.745 |
|  | DL | 0.662(0.530-0.794) | 74.0 | 87.5 | 51.7 | 75.0 | 71.4 | 0.808 |
|  | DLR | 0.732(0.616-0.848) | 71.4 | 75.0 | 65.5 | 78.3 | 61.3 | 0.766 |
| AdaBoost | Clinical | 0.63(0.507-0.752) | 57.1 | 43.7 | 79.3 | 77.8 | 46.0 | 0.560 |
|  | Radiomics | 0.695(0.574-0.817) | 70.1 | 72.9 | 65.5 | 77.8 | 59.4 | 0.753 |
|  | DL | 0.716(0.602-0.830) | 67.5 | 58.3 | 82.8 | 84.8 | 54.5 | 0.691 |
|  | DLR | 0.718(0.604-0.832) | 67.5 | 66.7 | 69.0 | 78.0 | 55.6 | 0.719 |
| MLP | Clinical | 0.639(0.513-0.765) | 64.9 | 75.0 | 48.3 | 70.6 | 53.8 | 0.727 |
|  | Radiomics | 0.705(0.587-0.824) | 70.1 | 72.9 | 65.5 | 77.8 | 59.4 | 0.753 |
|  | DL | 0.828(0.735-0.920) | 74.0 | 64.6 | 89.7 | 91.2 | 60.5 | 0.756 |
|  | DLR | 0.769(0.660-0.878) | 76.6 | 89.6 | 55.2 | 76.8 | 76.2 | 0.827 |

Abbrevation: apCR, axillary pathological complete response; AUC, area under the curve; CI, confidence interval; PPV, positive predictive value; NPV, negative predictive value; DL, deep learning; DLR, deep learning radiomics; NAT, neoadjuvant therapy; LR: logistic regression, SVM, support vector machine, KNN, K-nearest neighbors; LightGBM, Light Gradient Boosting Machine; MLP, multilayer perceptron.

**S9. Threshold Selection and Clinical Trade-offs**

The optimal probability threshold was determined in the training cohort using Youden’s index (cutoff = 0.773). This cutoff reflects the calibration characteristics of the logistic regression output probabilities.

The optimal decision threshold was obtained using Youden’s index in the training cohort. This threshold maximizes the balance between sensitivity and specificity. For clinical application, higher thresholds would improve specificity at the cost of missing potential apCR cases, whereas lower thresholds increase sensitivity but may lead to unnecessary axillary under-treatment. These trade-offs should be validated prospectively before selecting a clinically acceptable operating point.

**S10. Bootstrap Validation and Calibration**

Calibration performance of the DLR model was assessed in the validation cohort by comparing the predicted probabilities of axillary pathological complete response (apCR) with the observed apCR rates across deciles of predicted risk.

Patients were ranked by predicted probability and divided into ten equal-sized groups (deciles). For each decile, the mean predicted probability and the corresponding observed apCR rate were calculated. Calibration slope and intercept were estimated using logistic calibration with observed outcomes regressed on predicted log-odds.

S10.1 Decile-based calibration table for the DLR model (validation cohort)

| Decile | Mean predicted probability | Observed apCR rate |
| --- | --- | --- |
| 1 | 0.011 | 0.125 |
| 2 | 0.145 | 0.125 |
| 3 | 0.247 | 0.714 |
| 4 | 0.344 | 0.375 |
| 5 | 0.454 | 0.625 |
| 6 | 0.641 | 0.714 |
| 7 | 0.780 | 0.750 |
| 8 | 0.871 | 0.857 |
| 9 | 0.946 | 1.000 |
| 10 | 0.994 | 1.000 |

S10.2. Internal bootstrap validation (1000 iterations): optimism-corrected AUC

| Model | Apparent AUC (training) | Optimism | Optimism-corrected AUC |
| --- | --- | --- | --- |
| Clinical | 0.804 | 0.024 | 0.780 |
| Radiomics | 0.849 | 0.082 | 0.767 |
| DL | 0.873 | 0.134 | 0.739 |
| DLR | 0.939 | 0.120 | 0.819 |
